# Supplementary material
Source: Springer Nature journal article supplement (https://www.springermedizin.de/resource/supplementary/13045_2010_94_MOESM1_ESM.pdf/9660640)

Progression-Free Survival

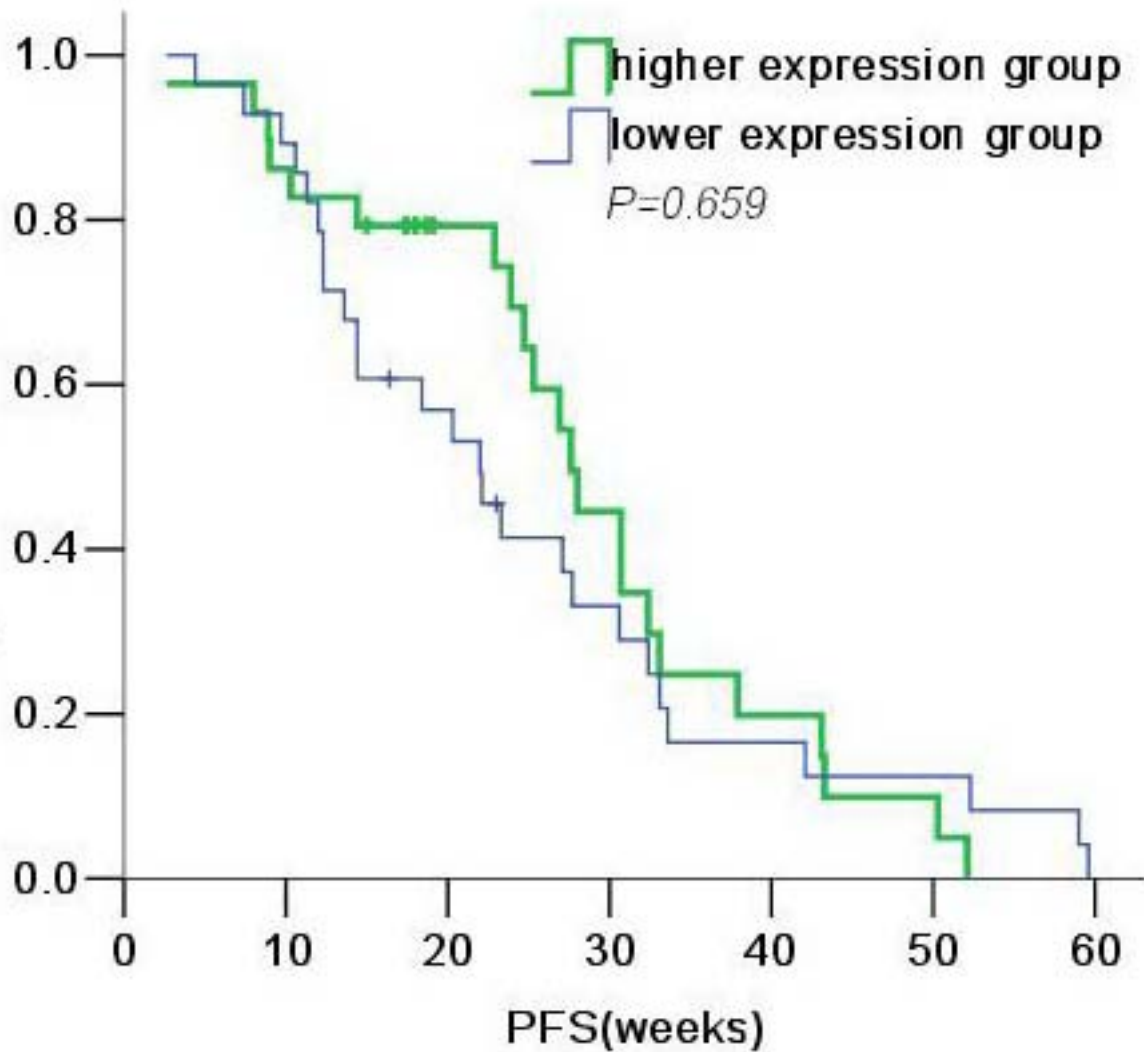

Supplement: MOESM1 [file 9660640]
